# Supplementary material for: Suppressing bias stress degradation in high performance solution processed organic transistors operating in air
Source: Nat Commun. 2021 Apr 21;12:2352. doi: 10.1038/s41467-021-22683-2 (PMC8060299; doi:10.1038/s41467-021-22683-2)
Supplement: Supplementary file 1 — Supplementary Information [file 41467_2021_22683_MOESM1_ESM.pdf]

## Supplementary Information

### **Suppressing bias stress degradation in high performance solution processed organic transistors operating in air**

Hamna F. Iqbal<sup>1</sup>, Qianxiang Ai<sup>2</sup>, Karl J. Thorley<sup>2</sup>, Hu Chen<sup>3</sup>, Iain McCulloch<sup>3,4</sup>, Chad Risko<sup>2</sup>, John E. Anthony<sup>2</sup> and Oana D. Jurchescu<sup>1,\*</sup>

<sup>1</sup>Department of Physics and Center for Functional Materials, Wake Forest University, Winston Salem, NC 27109, USA

<sup>2</sup>Department of Chemistry and Center for Applied Energy Research (CAER), University of Kentucky, Lexington, KY 40506, USA

<sup>3</sup>King Abdullah University of Science and Technology, KAUST Solar Center (KSC), Thuwal 23955-6900, Saudi Arabia

<sup>4</sup>Department of Chemistry, Chemistry Research Laboratory, University of Oxford, Oxford, OX1 3TA, UK

\*Corresponding author email: [Jurchescu@wfu.edu](mailto:Jurchescu@wfu.edu)

#### **Contents:**

|                                                                                                                                |    |
|--------------------------------------------------------------------------------------------------------------------------------|----|
| Supplementary Discussion 1: Operational stability tests on unencapsulated TnHS BDT trimer devices in ambient air.....          | 2  |
| Supplementary Discussion 2: Operational stability tests on unencapsulated TnHS BDT trimer devices in vacuum.....               | 4  |
| Supplementary Discussion 3: Environmental stability tests on unencapsulated TnHS BDT trimer devices.....                       | 6  |
| Supplementary Discussion 4: Computational details.....                                                                         | 7  |
| Supplementary Discussion 5: Operational stability tests on unencapsulated vs. encapsulated TnHS BDT trimer devices in air..... | 9  |
| Supplementary Discussion 5: Hysteresis in current-voltage characteristics of TnHS BDT trimer devices.....                      | 10 |
| Supplementary Discussion 6: Bias stress measurements on TnHS BDT trimer devices.....                                           | 11 |
| Supplementary Discussion 7: Bilayer dielectric IDT-BT devices.....                                                             | 12 |

**Supplementary Discussion 1: Operational stability tests on unencapsulated TnHS BDT trimer devices in ambient air**

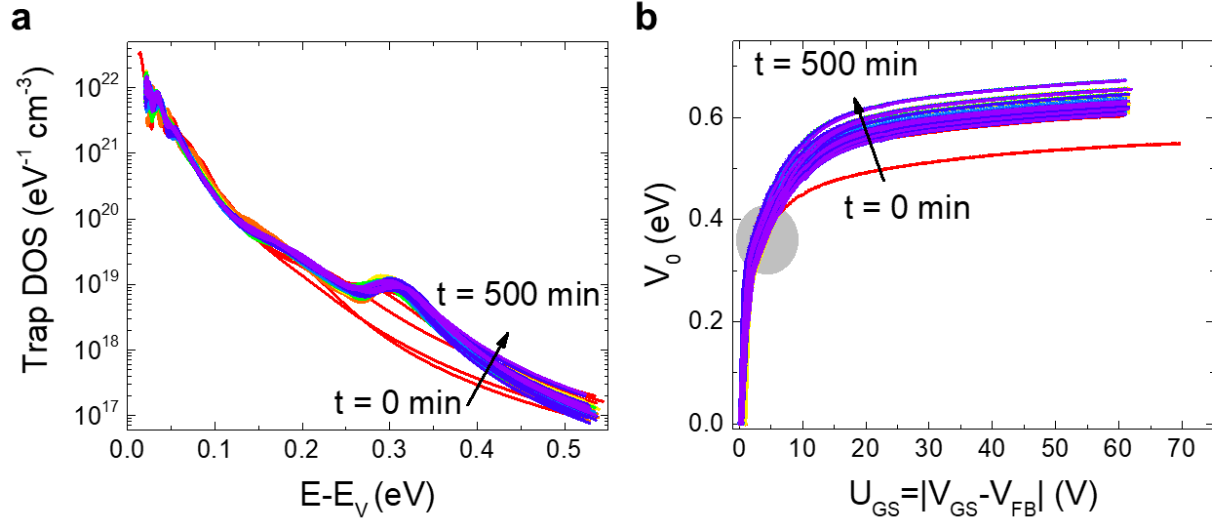

**Supplementary Figure 1 | Trap DOS analysis performed on an unencapsulated TnHS BDT trimer device operating in ambient air for 500 min. a,** DOS spectra evaluated during repeated transistor operation. **b,** The gate-voltage dependent interface potential function. The gray shaded area highlights a subtle change in the curvature of the plots giving rise to the peak in the corresponding DOS spectrum.

**Supplementary Table 1.** Model parameters used for the double exponential and Gaussian distributions employed to model the DOS spectra of a device operated in ambient air. The spectrum at  $t = 500$  min was modelled using only a double exponential distribution and therefore the Gaussian parameters are not applicable.

| Model Parameter                           | $t = 0$ min          | $t = 500$ min        |
|-------------------------------------------|----------------------|----------------------|
| $N_1$ ( $\text{eV}^{-1} \text{cm}^{-3}$ ) | $2.0 \times 10^{22}$ | $4.8 \times 10^{22}$ |
| $E_1$ (meV)                               | 25.0                 | 17.5                 |
| $N_2$ ( $\text{eV}^{-1} \text{cm}^{-3}$ ) | $5.2 \times 10^{19}$ | $5.0 \times 10^{20}$ |
| $E_2$ (meV)                               | 85.5                 | 64.9                 |
| $A$ ( $\text{eV}^{-1} \text{cm}^{-3}$ )   | N/A                  | $7.0 \times 10^{18}$ |
| $E_{\text{peak}}$ (eV)                    | N/A                  | 0.31                 |
| $\sigma$ (meV)                            | N/A                  | 25.0                 |

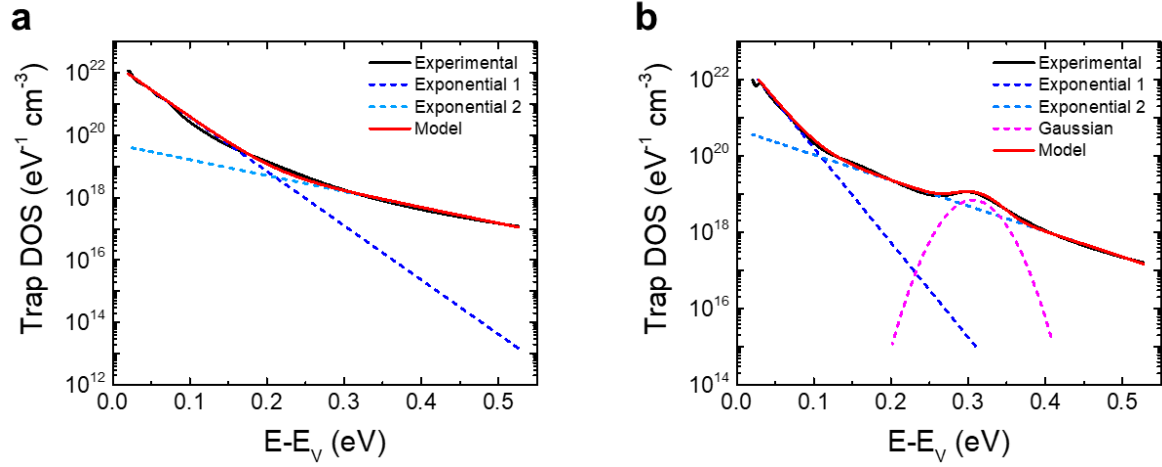

**Supplementary Figure 2 | Modeling of the trap DOS spectra of an unencapsulated TnHS BDT trimer device operating in ambient air.** Model fit (red solid lines) to experimental DOS spectrum (solid black lines) of a device at different times during operation: **a**,  $t = 0$  min and **b**, after  $t = 500$  min of operation. Broken lines represent the individual distribution functions employed for the modelling.

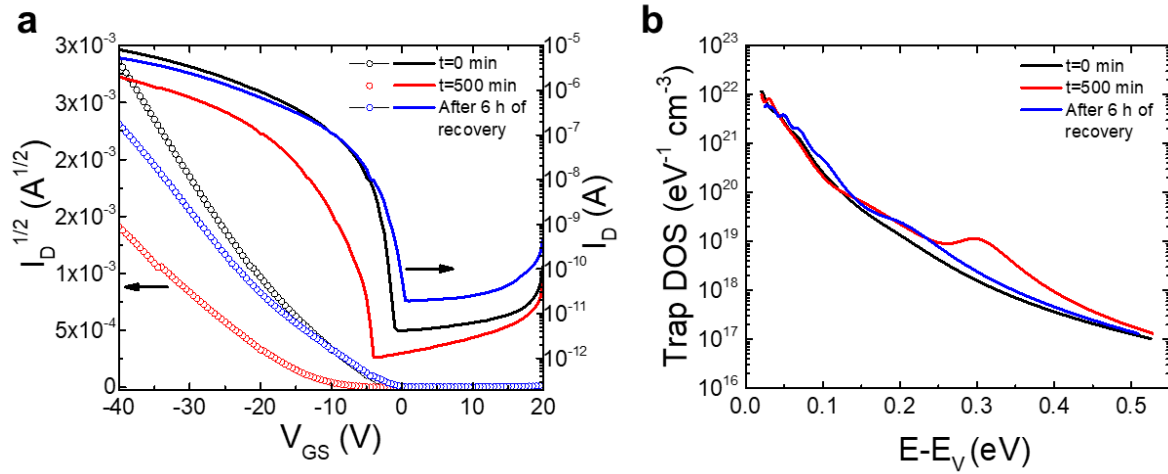

**Supplementary Figure 3 | Transistor characteristics of an unencapsulated TnHS BDT trimer device during repeated measurements and after recovery.** **a**, Saturation regime transfer characteristics ( $V_{DS} = -60$  V) of a device at  $t = 0$  min (black),  $t = 500$  min (red) of operation, and after 6 h of device recovery (blue). The left and right axes show the square root and the logarithm of  $I_D$  respectively. **b**, Trap DOS spectra evaluated at  $t = 0$  min (black),  $t = 500$  min (red) of operation, and after 6 h of device recovery (blue).

## Supplementary Discussion 2: Operational stability tests on unencapsulated TnHS BDT trimer devices in vacuum

**Supplementary Table 2.** Model parameters used for the double exponential distributions employed to model the DOS spectra of a device operated in vacuum.

| Model Parameter                            | t = 0 min            | t = 500 min          |
|--------------------------------------------|----------------------|----------------------|
| $N_1$ (eV <sup>-1</sup> cm <sup>-3</sup> ) | $1.5 \times 10^{22}$ | $7.4 \times 10^{20}$ |
| $E_1$ (meV)                                | 20.0                 | 9.1                  |
| $N_2$ (eV <sup>-1</sup> cm <sup>-3</sup> ) | $3.9 \times 10^{20}$ | $1.8 \times 10^{20}$ |
| $E_2$ (meV)                                | 53.4                 | 47.5                 |

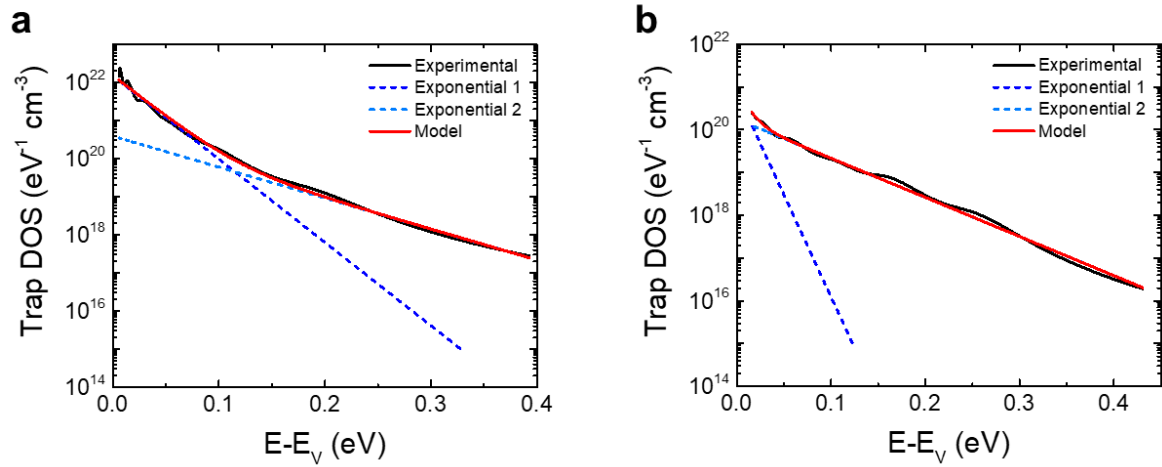

**Supplementary Figure 4 | Modeling of the trap DOS spectra of an unencapsulated device operating in vacuum.** Model fit (red solid lines) to experimental DOS spectrum (solid black lines) of a device at different times during operation: **a**, t = 0 min and **b**, after t = 500 min of operation. Broken lines represent the individual distribution functions employed for the modelling.

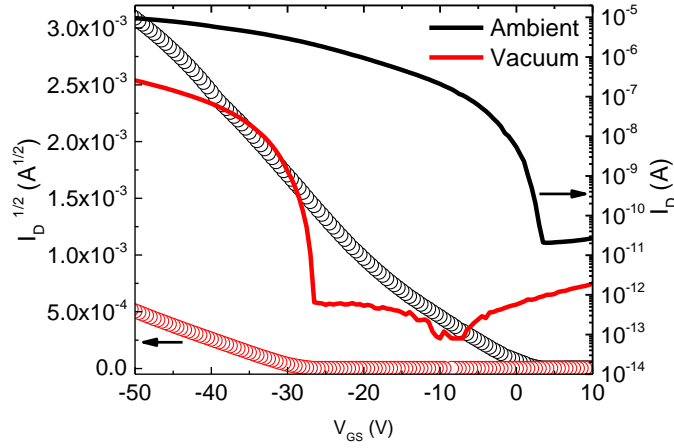

**Supplementary Figure 5 | Comparison of the current-voltage characteristics of an unencapsulated device measured under different environments.** Saturation regime transfer characteristics ( $I_D$  vs  $V_{GS}$  at  $V_{DS}=-60$  V) under ambient air (black) and vacuum (red). The left and right axes show the square root and the logarithm of  $I_D$  respectively.

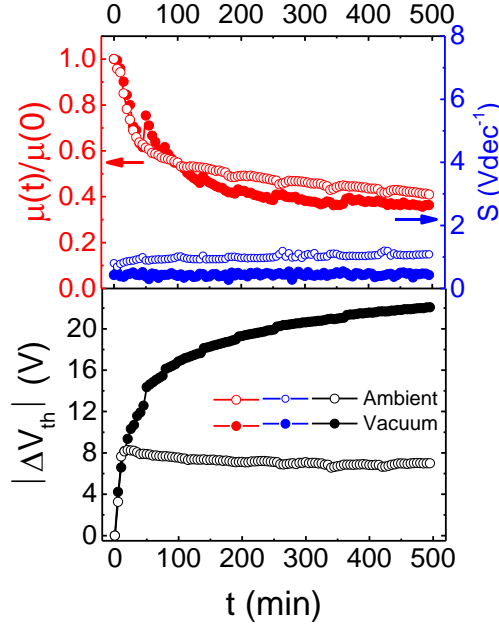

**Supplementary Figure 6 | Time evolution of device metrics of an unencapsulated TnHS BDT trimer device during repetitive transistor operation under different environments.** Open circles and solid circles represent measurements obtained in ambient air and vacuum, respectively. Time evolution of the mobility  $\mu$  normalized to the value at  $t = 0$  min (red), subthreshold slope  $S$  (blue) and magnitude of threshold voltage shifts  $|\Delta V_{th}|$  (black) are shown.

### Supplementary Discussion 3: Environmental stability tests on unencapsulated TnHS BDT trimer devices

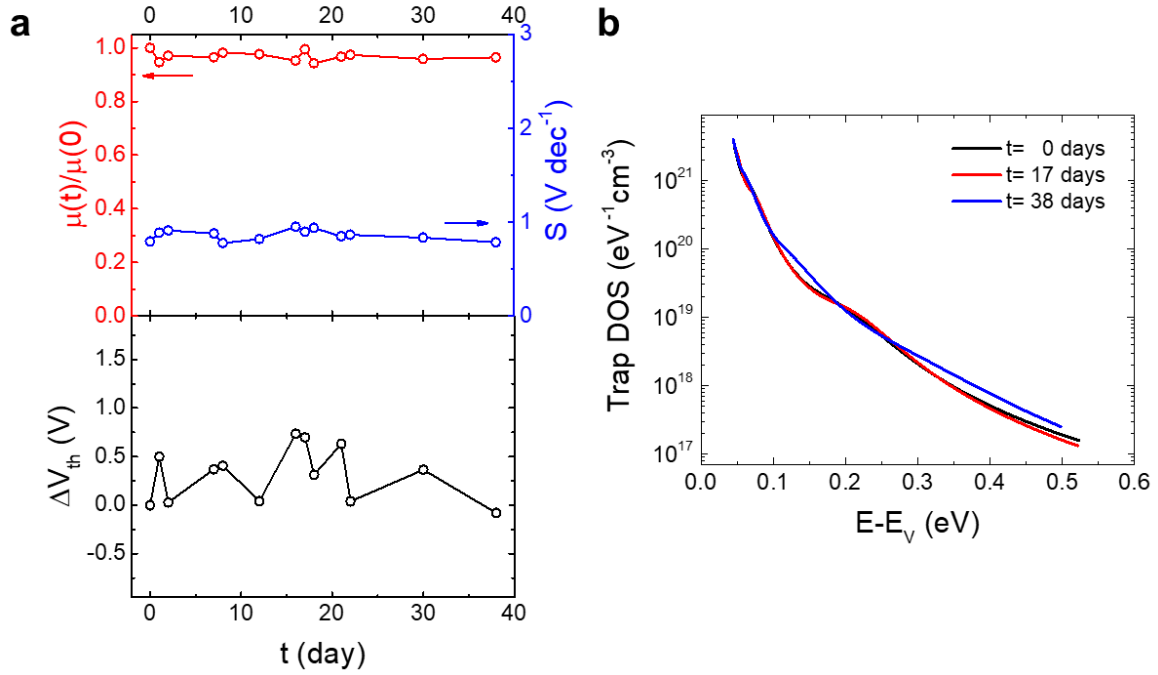

**Supplementary Figure 7 | Time evolution of device metrics and trap DOS spectrum of an unencapsulated**

**TnHS BDT trimer device during environmental stability tests. a,** Time evolution of the mobility  $\mu$  normalized to the value at  $t = 0$  min (red), subthreshold slope  $S$  (blue) and threshold voltage shifts  $\Delta V_{th}$  (black) are shown. **b,** Trap DOS spectra evaluated over the course of environmental stability tests performed for 38 days.

#### Supplementary Discussion 4: Computational details

Density functional theory (DFT) calculations were carried out on isolated molecules and bulk crystal structures. Molecular calculations were performed at the  $\omega$ B97XD/Def2SVP level of theory as implemented in Gaussian 16<sup>3-5</sup>. Bulk crystal calculations were carried out with Vienna *Ab-initio* Simulation Package<sup>6-9</sup>, making use of the Perdew, Burke, and Ernzerhof exchange-correlation functional<sup>10</sup>. The electron-ion interactions were described with the projector augmented wave method<sup>11</sup>. The kinetic energy cutoff for the plane-wave basis set was set to 520 eV, and a Gaussian smearing with a width of 50 meV was employed. The D3 correction was employed with BJ-damping to describe the dispersion forces<sup>12</sup>. The convergence criterion of the total energy was set to  $10^{-5}$  eV in the self-consistent field loop, and that of forces during relaxation was set to 0.01 eV/Å. Considering the large volume of the TnHS BDT trimer unit cell, Gamma centered  $2 \times 2 \times 1$  mesh was used to sample the Brillouin zone. Unit cells are also used for charged defects as the shortest translation vector is larger than 10 Å.

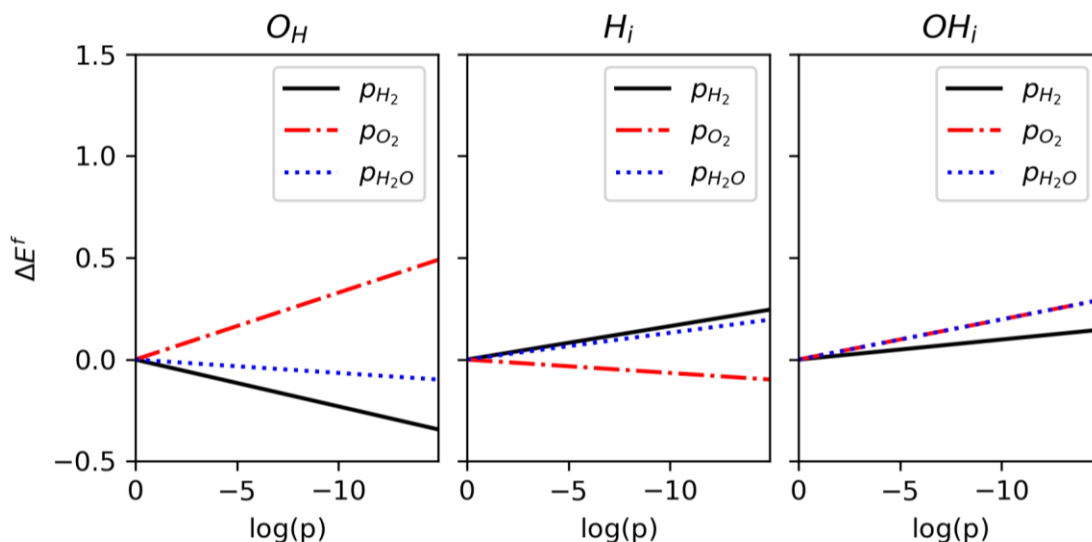

Supplementary Figure 8 | Linear relationships between  $\Delta E^f$  and  $\log(P)$  for the three potential chemical defects of TnHS BDT trimer.

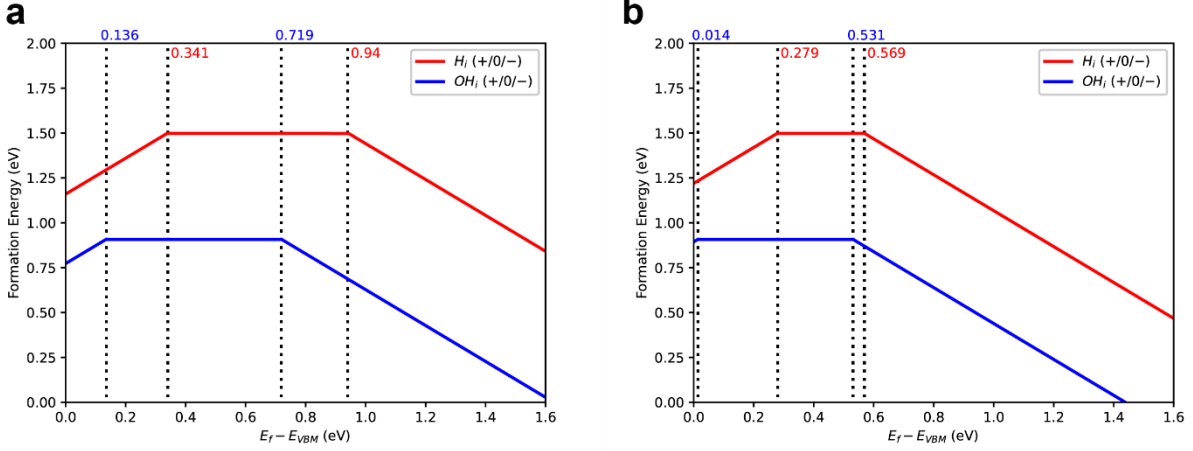

**Supplementary Figure 9 | Defect formation energies as a function of Fermi level relative to the valence band edge for  $H_i$  and  $OH_i$  defects in TnHS BDT trimer at  $P_{O_2} = P_{H_2} = P_{H_2O} = 10^{-10}$  Pa. **a**, Defect formation energies without correction and **b**, after applying the correction scheme (FNV) proposed by Freysoldt *et al.*<sup>13,14</sup>, as implemented in PyCDT<sup>15</sup>. Transition levels are labeled with vertical dotted lines. Only monocation or monoanion states are considered.**

**Supplementary Discussion 5: Operational stability tests on unencapsulated vs. encapsulated TnHS BDT trimer device in air**

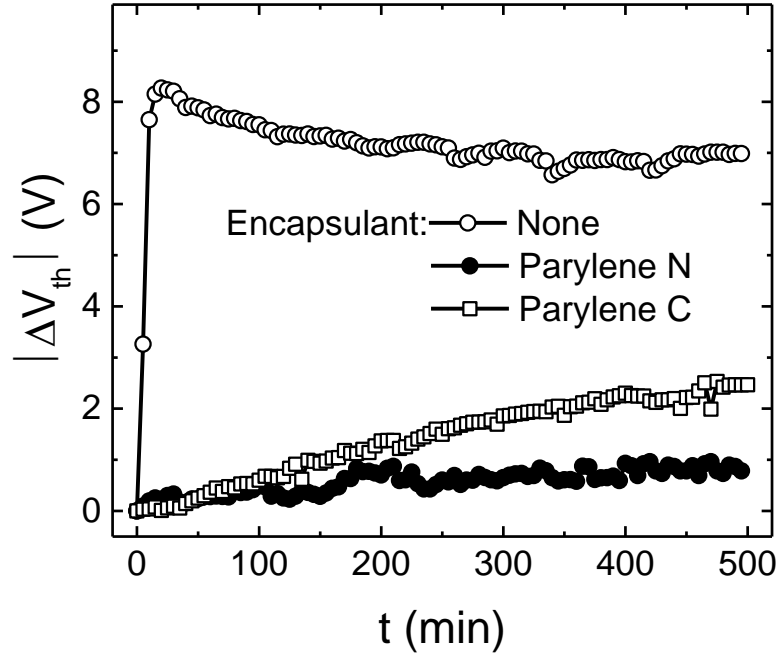

**Supplementary Figure 10 | Comparison of threshold voltage shifts of unencapsulated and encapsulated TnHS BDT trimer devices during repetitive transistor operation for 500 min in air.** An unencapsulated device (open circles) yielded a shift of  $\Delta V_{th} = -8$  V while devices encapsulated with parylene N (solid circles) and parylene C (open squares) yielded shifts of  $\Delta V_{th} = -0.9$  V and  $\Delta V_{th} = -2.5$  V respectively.

## Supplementary Discussion 6: Hysteresis in current-voltage characteristics of TnHS BDT trimer devices

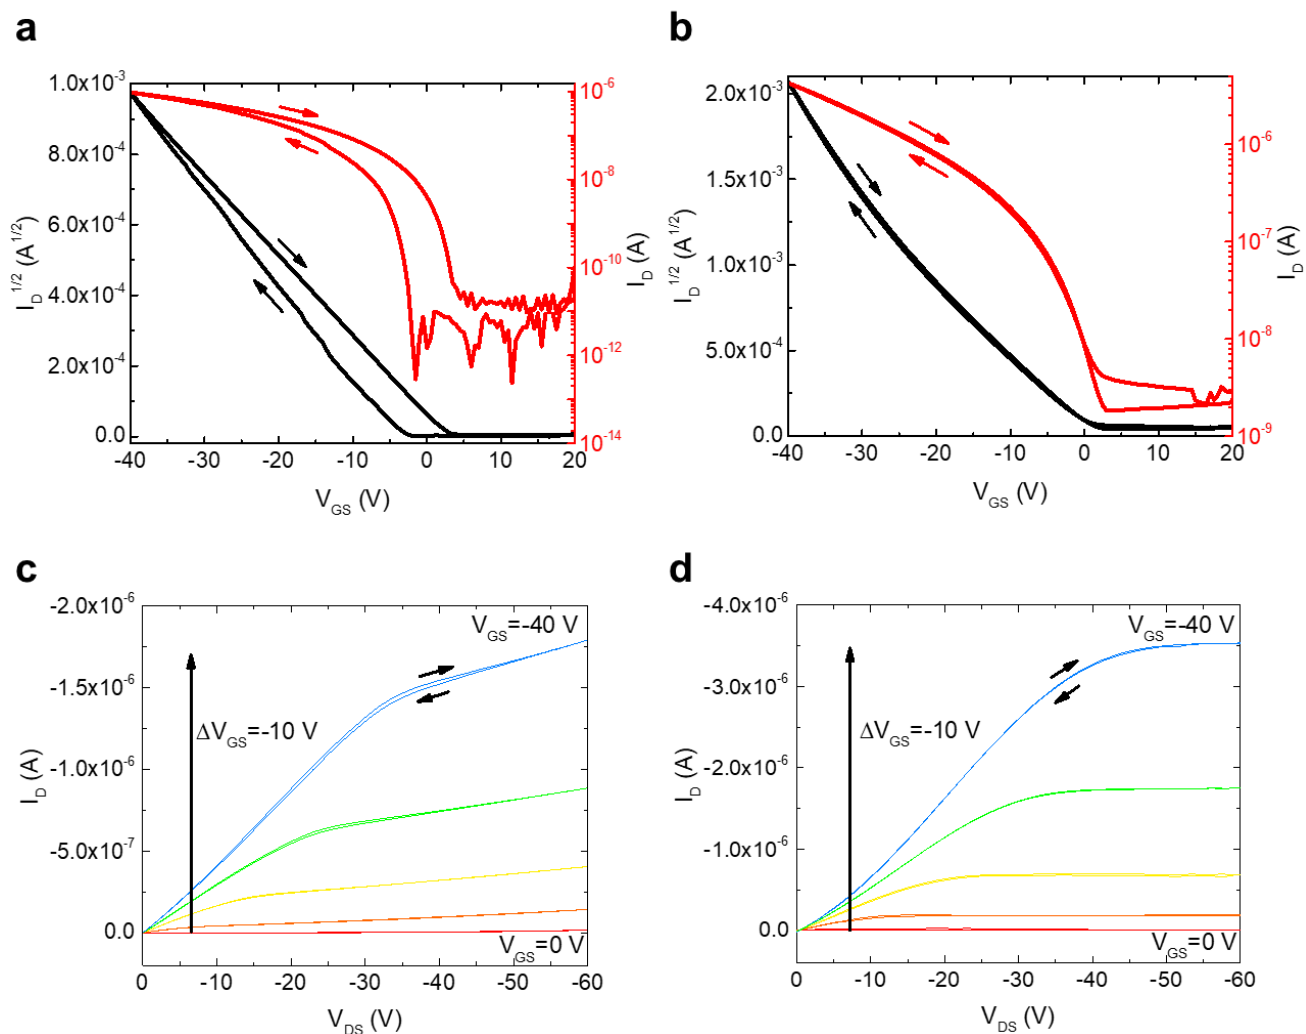

**Supplementary Figure 11 | Hysteresis in current-voltage characteristics of unencapsulated and parylene N-encapsulated TnHS BDT trimer devices.** **a**, Hysteresis in the transfer characteristics of an unencapsulated device in comparison to **b**, a device encapsulated with parylene N. **c**, Hysteresis in the transport characteristics of the unencapsulated device in comparison to **d**, the encapsulated device.

## Supplementary Discussion 7: Bias stress measurements on TnHS BDT trimer devices

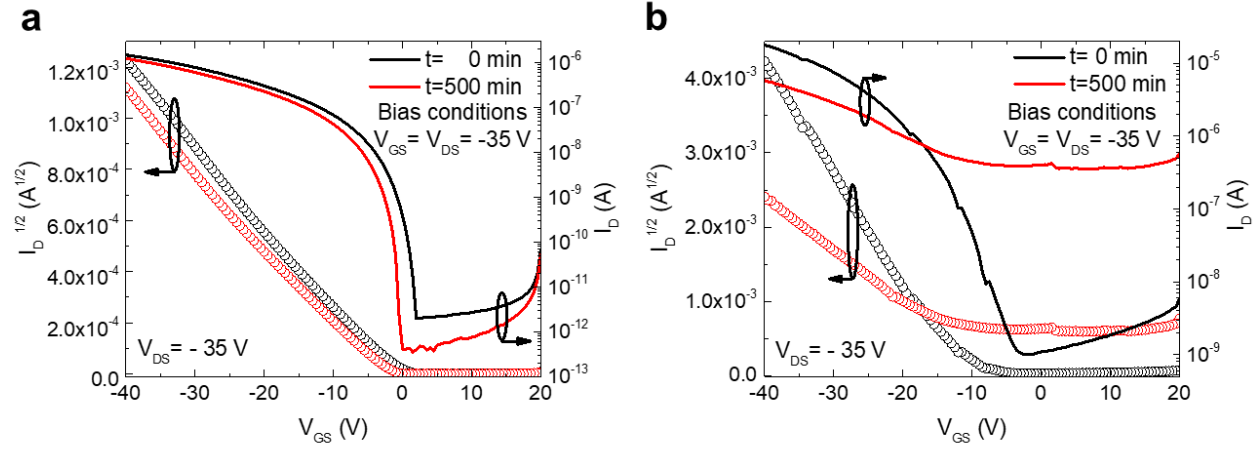

**Supplementary Figure 12 | Bias stress measurements on a TnHS BDT trimer device encapsulated with parylene C compared to an unencapsulated device. a,** Transfer characteristics of a device encapsulated with parylene C acquired at  $V_{DS} = -35$  V prior to stressing (black) and after 500 min of stressing (red) under the application of a continuous drain voltage and a dynamic gate bias pulsed at 10 s interval at  $V_{DS} = V_{GS} = -35$  V. The threshold voltage shift is  $\Delta V_{th} = -1.3$  V. **b,** Transfer characteristics of an unencapsulated device acquired at  $V_{DS} = -35$  V prior to stressing (black) and after 500 min of stressing (red) under identical bias conditions. The threshold voltage shift is  $\Delta V_{th} = +4.9$  V.

## Supplementary Discussion 8: Bilayer dielectric IDT-BT devices

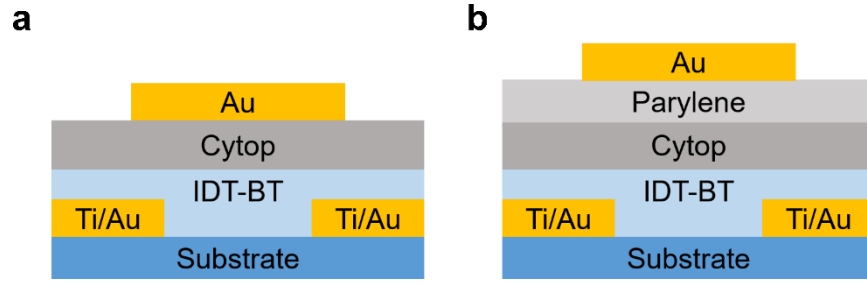

**Supplementary Figure 13 | IDT-BT device geometries fabricated and tested. a,** Bottom-contact, top-gate device with Cytop dielectric. **b,** Bottom-contact, top-gate device with bilayer dielectric consisting of Cytop and parylene.

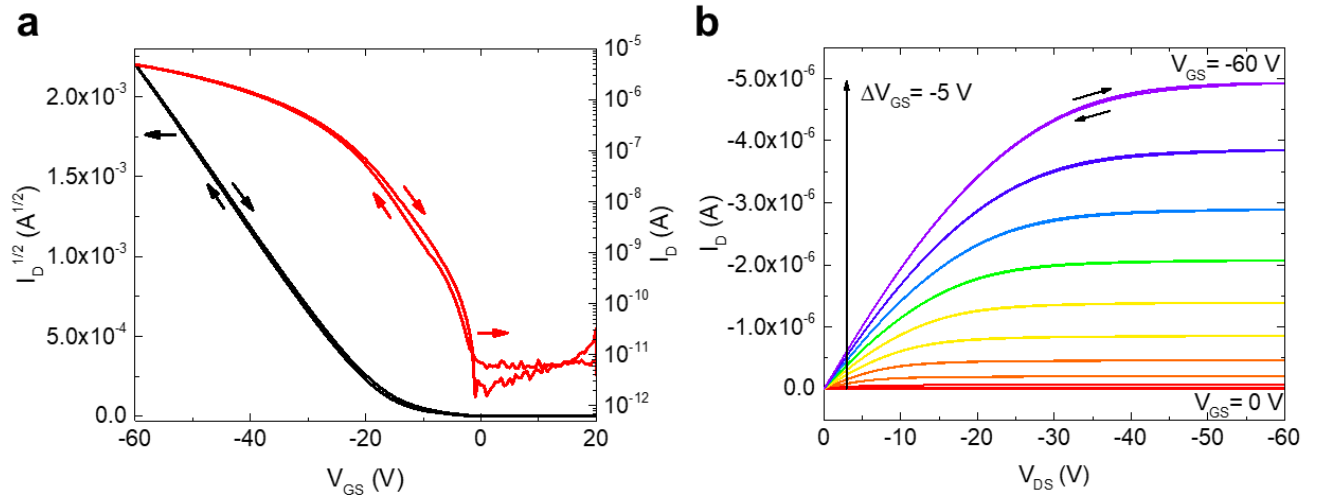

**Supplementary Figure 14 | Hysteresis in current-voltage characteristics of a bilayer dielectric IDT-BT device.**

**a,** Hysteresis in the transfer characteristics. **b,** Hysteresis in the output characteristics.

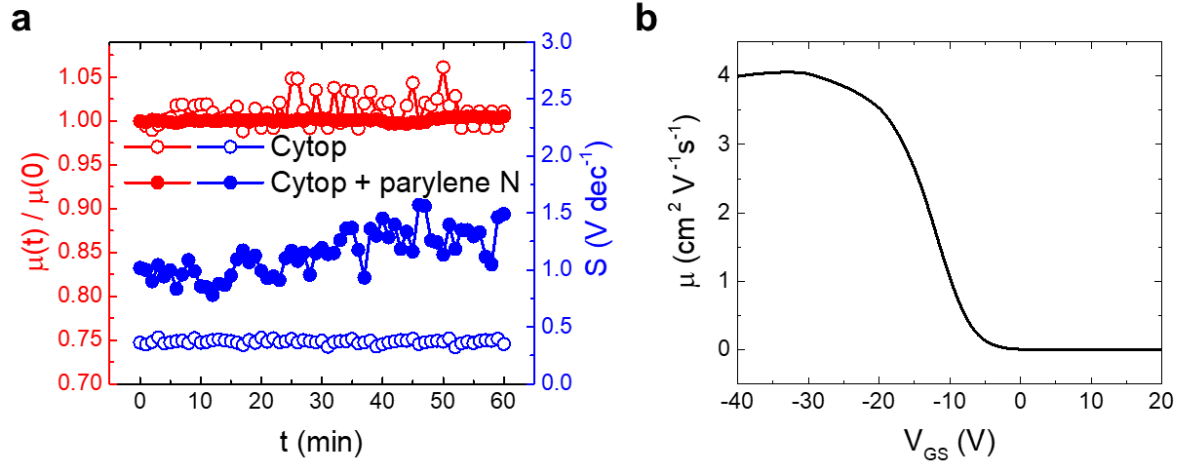

**Supplementary Figure 15 | Time evolution of device metrics and the dependency of mobility on gate-voltage in IDT-BT devices fabricated with different dielectrics. a,** Left and right axes show the change in normalized mobility and subthreshold slope respectively of a Cytop-only device (open circles) in comparison to a bilayer dielectric device (solid circles). **b,** Gate voltage dependence of the mobility of the bilayer dielectric device with  $L = 100 \mu\text{m}$ ,  $W = 200 \mu\text{m}$  and an equivalent areal capacitance of  $C_i = 1.26 \text{ nF cm}^{-2}$ .

## Supplementary References

1. Massey, L. K. *Permeability Properties of Plastics and Elastomers, 2nd Ed.: A Guide to Packaging and Barrier Materials*. (Elsevier Science, 2003).
2. McKeen, L. W. *Permeability Properties of Plastics and Elastomers: Fourth Edition. Permeability Properties of Plastics and Elastomers: Fourth Edition* (Elsevier Science, 2016).
3. Chai, J.-D. & Head-Gordon, M. Long-range corrected hybrid density functionals with damped atom–atom dispersion corrections. *Phys. Chem. Chem. Phys.* **10**, 6615 (2008).
4. Dunning, T. H. Gaussian basis sets for use in correlated molecular calculations. I. The atoms boron through neon and hydrogen. *J. Chem. Phys.* **90**, 1007–1023 (1989).
5. Frisch, M. J. *et al.* G16\_C01. Gaussian 16, Revision C.01, Gaussian, Inc., Wallin (2016).
6. Kresse, G. & Hafner, J. Ab initio molecular dynamics for liquid metals. *Phys. Rev. B* **47**, 558–561 (1993).
7. Kresse, G. & Joubert, D. From ultrasoft pseudopotentials to the projector augmented-wave method. *Phys. Rev. B* **59**, 1758–1775 (1999).
8. Kresse, G. & Furthmüller, J. Efficient iterative schemes for ab initio total-energy calculations using a plane-wave basis set. *Phys. Rev. B* **54**, 11169–11186 (1996).
9. Kresse, G. & Furthmüller, J. Efficiency of ab-initio total energy calculations for metals and semiconductors using a plane-wave basis set. *Comput. Mater. Sci.* **6**, 15–50 (1996).
10. Perdew, J. P. *et al.* Erratum: Atoms, molecules, solids, and surfaces: Applications of the generalized gradient approximation for exchange and correlation. *Phys. Rev. B* **48**, 4978–4978 (1993).
11. Blöchl, P. E. Projector augmented-wave method. *Phys. Rev. B* **50**, 17953–17979 (1994).
12. Grimme, S., Ehrlich, S. & Goerigk, L. Effect of the damping function in dispersion corrected density functional theory. *J. Comput. Chem.* **32**, 1456–1465 (2011).
13. Freysoldt, C., Neugebauer, J. & Van de Walle, C. G. Fully Ab Initio Finite-Size Corrections for

- Charged-Defect Supercell Calculations. *Phys. Rev. Lett.* **102**, 016402 (2009).
14. Freysoldt, C., Neugebauer, J. & Van de Walle, C. G. Electrostatic interactions between charged defects in supercells. *Phys. status solidi* **248**, 1067–1076 (2011).
  15. Broberg, D. *et al.* PyCDT: A Python toolkit for modeling point defects in semiconductors and insulators. *Comput. Phys. Commun.* **226**, 165–179 (2018).
